# Supplementary material for: The role of 2-ethylhexanoic acid in manipulating the morphology and upconversion of flame-made Y2O3:Yb3+/Ho3+ nanoparticles towards remote temperature sensing
Source: Royal Society of Chemistry journal article supplement (doi:10.1039/d2ce00831a), 2022-01-01
Supplement: d2ce00831a1.pdf [file d2ce00831a1.pdf]

# The role of 2-Ethylhexanoic acid in manipulating the morphology and upconversion of the flame-made $\text{Y}_2\text{O}_3:\text{Yb}^{3+}/\text{Ho}^{3+}$ nanoparticles toward remote temperature sensing

Shuai Hu<sup>a</sup>, Maohui Yuan<sup>ab</sup>, Changqing Song<sup>\*ac</sup>, Kai Han<sup>\*ad</sup>, Linxuan Wang<sup>a</sup>, Hanchang Huang<sup>a</sup>, Wenda Cui<sup>ac</sup>, Zining Yang<sup>ac</sup>, and Hongyan Wang<sup>ac</sup>

<sup>a</sup>College of Advanced Interdisciplinary Studies, National University of Defense Technology, Changsha, 410073, China. E-mail: [hankai0071@nudt.edu.cn](mailto:hankai0071@nudt.edu.cn).

<sup>b</sup>Department of Physics and Chemistry, PLA Army Academy of Special Operations, Guangzhou, 510507, China.

<sup>c</sup>Hunan Provincial Key Laboratory of High Energy Laser Technology, Changsha, 410073, China.

<sup>d</sup>State Key Laboratory of Pulsed Power Laser Technology, Changsha, 410073, China.

<sup>‡</sup>These authors contributed equally to this work and should be considered co-first authors.

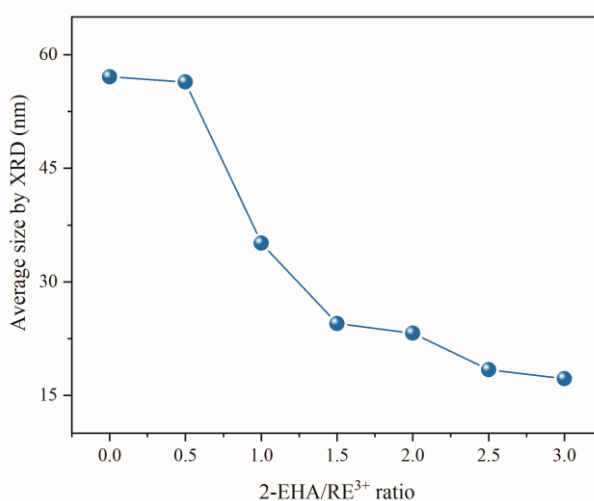

**Fig.S1** Average size of  $\text{Y}_2\text{O}_3:\text{Yb}^{3+}$ (8 mol%)/ $\text{Ho}^{3+}$ (1 mol%) UCNPs with different 2-EHA/ $\text{RE}^{3+}$  molar ratios ( $x/1$ ,  $x = 0, 0.5, 1, 1.5, 2, 2.5, 3$ ) calculated by XRD.

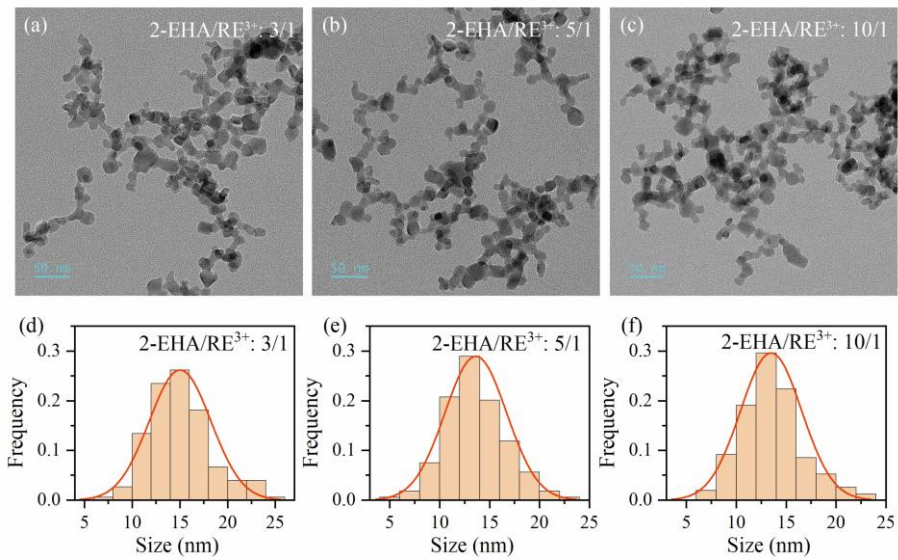

**Fig.S2** TEM images of  $\text{Y}_2\text{O}_3:\text{Yb}^{3+}(8 \text{ mol}\%)/\text{Ho}^{3+}(1 \text{ mol}\%)$  UCNP with 2-EHA/ $\text{RE}^{3+}$  molar ratios:  $x/1$ , (a)  $x = 3$ ; (b)  $x = 5$ ; (c)  $x = 10$ . The corresponding particle size distribution based on TEM images (a) (b) and (c) recorded as (d), (e) and (f), respectively.

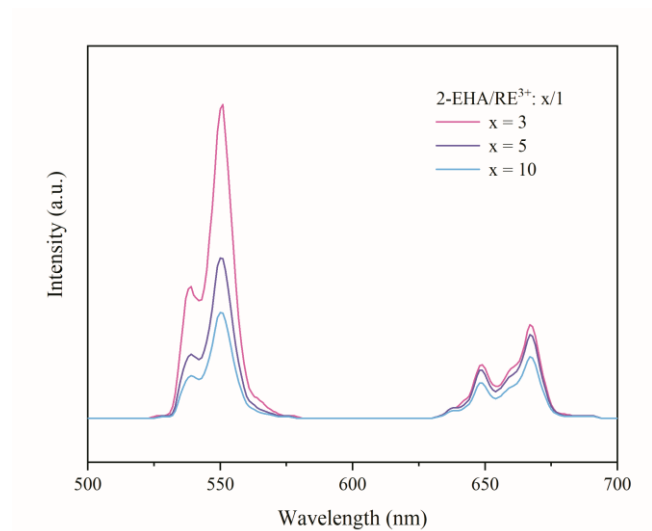

**Fig.S3** UCL spectra of  $\text{Y}_2\text{O}_3:\text{Yb}^{3+}(8 \text{ mol}\%)/\text{Ho}^{3+}(1 \text{ mol}\%)$  UCNP with 2-EHA/ $\text{RE}^{3+}$  molar ratio ( $x/1$ ,  $x = 3, 5, 10$ ) under the excitation of 976 nm laser with the power density of  $159.09 \text{ W cm}^{-2}$ ;
